# Supplementary material for: Catalytic (transfer) deuterogenation in D2O as deuterium source with H2 and HCO2H as electron sources
Source: Royal Society of Chemistry journal article supplement (doi:10.1039/b908764h), 2009-01-01

## Catalytic Deuteration in D<sub>2</sub>O as Deuterium Source with H<sub>2</sub> and HCO<sub>2</sub>H as Electron Sources

Yuichiro Himeda <sup>\*a</sup>, Satoru Miyazawa <sup>b</sup>, Nobuko Onozawa-Komatsuzaki <sup>a</sup>, Takuji Hirose <sup>b</sup>, and Kazuyuki Kasuga <sup>a</sup>

<sup>a</sup> *National Institute of Advanced Industrial Science and Technology, Tsukuba Central 5-2, 1-1-1 Higashi, Tsukuba, Ibaraki 305-8565, Japan.* <sup>b</sup> *Saitama University, Shimo-ohkubo 255, Sakura-ku, Saitama, Saitama 338-8570, Japan*

| <i>Table of Contents</i>                       | Page |
|------------------------------------------------|------|
| General considerations                         | S2   |
| Preparation of rhodium and ruthenium catalysts | S2   |
| General procedure for deuteration procedures   | S3   |
| Characterization data                          | S3   |
| Figures                                        | S5   |
| NMR spectra                                    | S7   |

## General considerations

All manipulations were carried out under an argon atmosphere. All aqueous solutions were degassed prior to use.  $^1\text{H}$ ,  $^2\text{H}$  and  $^{13}\text{C}$  NMR spectra were recorded on a Varian INOVA 400 spectrometer using sodium 3-(trimethylsilyl)-1-propionic acid- $d_4$  (TSP- $d_4$ ) as an internal standard. Mass spectra were recorded on Waters ZQ2000 (ESI). Elemental analyses were carried out on an Eager 200 instrument. The reaction solution was analyzed by GC (PEG-HT 5%, Uniport HT 60/80, 2 m packed column, 100 °C) or HPLC (Tosoh TSKgel ODS-100V). FT-IR spectra were recorded on a Perkin Elmer Spectrum One spectrometer. The pH values were measured on an Orion Model 290A pH meter with a glass electrode after calibration to standard buffer solutions. The pD values were corrected by adding 0.4 to the observed values ( $\text{pD} = \text{pH meter reading} + 0.4$ ).<sup>1,2</sup> The complexes **1-3** were prepared according to the literature procedures.<sup>3</sup>  $\text{D}_2\text{O}$  (99.9%) and  $\text{DCO}_2\text{D}$  (95wt%) in  $\text{D}_2\text{O}$  were purchased from Isotec. Research grade  $\text{H}_2$  (>99.9999%) was used.

## Preparation of rhodium and ruthenium catalysts

**[Cp\* $\text{Rh}(\text{H}_2\text{L})(\text{H}_2\text{O})](\text{SO}_4)$  (**4**):** An aqueous solution (50 mL) of  $[\text{Cp}^*\text{RhCl}_2]_2$  (250 mg, 0.41 mmol) and  $\text{Ag}_2\text{SO}_4$  (253 mg, 0.82 mmol) was stirred at 40 °C for 12 h. The reaction mixture was filtered to remove insoluble  $\text{AgCl}_2$ . A 4,4'-dihydroxy-2,2'-bipyridine (154 mg, 0.82 mmol) was added to the filtrate. The solution was stirred at 40 °C for 12 h. The solution was filtered and the volume of the filtrate was reduced to ~5 mL in vacuo. The solution was placed in a refrigerator to give a yellow solid **4** (420 mg, 95%).  $^1\text{H}$  NMR ( $\text{D}_2\text{O}/\text{KOD}$ ):  $\delta$  8.28 (d,  $J = 6.6$  Hz, 2H), 7.14 (d,  $J = 2.5$  Hz, 2H), 6.69 (dd,  $J = 6.6, 2.5$  Hz, 2H), 1.56 (s, 15H);  $^{13}\text{C}$  NMR ( $\text{D}_2\text{O}/\text{KOD}$ ):  $\delta$  178.83, 159.08, 153.26, 121.52, 115.95, 96.02 (d,  $J_{\text{RhH}} = 8.4$  Hz), 10.29;  $^1\text{H}$  NMR ( $\text{D}_2\text{O}$ ):  $\delta$  8.76 (d,  $J = 6.4$  Hz, 2H), 7.69 (bs, 2H), 7.24 (dd,  $J = 6.4, 2.4$  Hz, 2H), 1.68 (s, 15H);  $^{13}\text{C}$  NMR ( $\text{D}_2\text{O}$ ):  $\delta$  170.34, 159.36, 154.92, 118.92, 114.20, 99.62 (d,  $J_{\text{RhC}} = 9.2$  Hz), 10.63; IR (KBr): 1621, 1500, 1450, 1111  $\text{cm}^{-1}$ ; Anal. Calcd for  $\text{C}_{20}\text{H}_{25}\text{N}_2\text{O}_7\text{SRh} + 2\text{H}_2\text{O}$ : C, 41.67; H, 5.07; N, 4.86; S, 5.56. Found: C, 41.75; H, 5.16; N, 4.88; S, 5.60; ESIMS:  $m/z$  425  $[\text{M} - \text{SO}_4 - \text{H}_2\text{O} - \text{H}]^-$ .

**$[(\text{C}_6\text{Me}_6)\text{Ru}(\text{H}_2\text{L})(\text{H}_2\text{O})](\text{SO}_4)$ :** An aqueous solution (50 mL) of  $[(\text{C}_6\text{Me}_6)\text{RuCl}_2]_2$  (250 mg, 0.37 mmol) and  $\text{Ag}_2\text{SO}_4$  (234 mg, 0.75 mmol) was stirred at 40 °C for 12 h. The reaction mixture was filtered to remove insoluble  $\text{AgCl}_2$ . A 4,4'-dihydroxy-2,2'-bipyridine (142 mg, 0.75 mmol) was added to the filtrate. The

solution was stirred at 40 °C for 12 h. The solution was filtered and the volume of the filtrate was reduced to ~5 mL in vacuo. The solution was placed in a refrigerator to give a yellow solid **5** (333 mg, 59%). <sup>1</sup>H NMR (D<sub>2</sub>O/KOD): δ 8.19 (d, *J* = 6.6 Hz, 2H), 7.06 (d, *J* = 2.7 Hz, 2H), 6.64 (dd, *J* = 6.6, 2.7 Hz, 2H), 1.95 (s, 18H); <sup>13</sup>C NMR (D<sub>2</sub>O/KOD): δ 178.68, 159.19, 155.10, 121.08, 115.74, 95.27, 17.39; <sup>1</sup>H NMR (D<sub>2</sub>O): δ 8.74 (d, *J* = 6.5 Hz, 2H), 7.59 (d, *J* = 2.5 Hz, 2H), 7.18 (dd, *J* = 6.5, 2.6 Hz, 2H), 2.10 (s, 18H); <sup>13</sup>C NMR (D<sub>2</sub>O): δ 159.8, 156.77, 145.26, 119.07, 114.52, 97.59, 17.74; IR (KBr): 1619, 1494, 1452, 1109 cm<sup>-1</sup>; Anal. Calcd for C<sub>22</sub>H<sub>28</sub>N<sub>2</sub>O<sub>7</sub>SRu: C, 46.72; H, 4.99; N, 4.95; S, 5.67. Found: C, 46.95; H, 5.27; N, 4.71; S, 5.54; ESIMS: *m/z* 451 [M – SO<sub>4</sub> – H<sub>2</sub>O – H]<sup>-</sup>.

### General procedure for deuteration

A solution of complex in D<sub>2</sub>O was added to a solution of substrate in D<sub>2</sub>O. The reaction solution was stirred at 50 °C under 1 MPa of H<sub>2</sub>. The yield was analyzed by GC (PEG-HT 5%, Uniport HT 60/80, 2 m packed column, 100 °C) or HPLC (Tosoh TSKgel SCX(H<sup>+</sup>)). The ratios of deuterium incorporation were analyzed by <sup>1</sup>H NMR spectroscopy.

### Characterization data

**1-Deuteriocyclopentanol:** <sup>1</sup>H NMR (D<sub>2</sub>O): δ 4.26-4.33 (m, 0.08H), 1.85-1.45 (m, 8.00H); <sup>13</sup>C NMR (D<sub>2</sub>O): δ 76.77, 76.39 (t), 36.96, 25.71.

**1-Deuteriocyclohexanol:** <sup>1</sup>H NMR (D<sub>2</sub>O): δ 3.66-3.57 (m, 0.26H), 1.91-1.80 (m, 1.84H), 1.75-1.62 (m, 1.94H), 1.56-1.48 (m, 1.00H), 1.32-1.04 (m, 4.58H); <sup>13</sup>C NMR (D<sub>2</sub>O): δ 69.49, 69.02 (t), 33.32, 24.10, 22.97.

**1-Deuteriocycloheptanol:** <sup>1</sup>H NMR (CDCl<sub>3</sub>): δ 3.89-3.80 (m, 0.14H), 1.98-1.32 (m, 12.00H); <sup>13</sup>C NMR (CDCl<sub>3</sub>): δ 72.82, 72.33 (t), 37.50, 28.14, 22.64.

**2-Deuterio-2-propanol:** <sup>1</sup>H NMR (D<sub>2</sub>O): δ 4.01 (m, 0.09H), 1.15 (bs, 6.00H); <sup>13</sup>C NMR (D<sub>2</sub>O): δ 67.14, 66.75 (t), 26.46.

**2-Deuterio-3-methyl-2-butanol:** <sup>1</sup>H NMR (D<sub>2</sub>O): δ 3.59 (m, 0.14H), 1.62 (m, 0.89H), 1.11 (bs, 3.00H), 0.87 and 0.86 (two d, 6.03H); <sup>13</sup>C NMR (D<sub>2</sub>O): δ 75.77, 75.30 (t), 36.84, 21.17, 20.18, 20.15.

**1-Deuterio-1-phenylethanol:** <sup>1</sup>H NMR (CDCl<sub>3</sub>): δ 7.40-7.23 (bs, 4.80H included CDCl<sub>3</sub>), 4.87 (m, 0.27H), 1.49 (bs, 3.00H); <sup>13</sup>C NMR (CDCl<sub>3</sub>): δ 145.75, 128.50, 127.48, 125.39, 70.41, 69.99 (t), 25.00.

**1-Deuterio-1-(4-chlorophenyl)ethanol:** <sup>1</sup>H NMR (CDCl<sub>3</sub>): δ 7.32-7.28 (bs, 3.81H),

4.87 (m, 0.19H), 1.46 (bs, 3.00H);  $^{13}\text{C}$  NMR ( $\text{CDCl}_3$ ):  $\delta$  144.26, 133.06, 128.59, 126.81, 69.70, 69.29 (t), 25.10.

**1-Deuterio-1-(2-chlorophenyl)ethanol:**  $^1\text{H}$  NMR ( $\text{CDCl}_3$ ):  $\delta$  7.60 (dt,  $J = 1.6, 7.6$  Hz, 0.98H), 7.34-7.26 (bs, 2.01H), 7.20 (dt,  $J = 1.6, 7.5$  Hz, 0.91H), 5.30 (m, 0.13H), 1.49 (bs, 3.00H);  $^{13}\text{C}$  NMR ( $\text{CDCl}_3$ ):  $\delta$  143.02, 131.63, 129.38, 128.39, 127.20, 126.44, 66.94, 66.57 (t), 23.38.

1. P. K. Glasoe and F. A. Long, *J. Phys. Chem.*, 1960, **64**, 188-190.
2. K. Mikkelsen and S. O. Nielsen, *J. Phys. Chem.*, 1960, **64**, 632-637.
3. Y. Himeda, N. Onozawa-Komatsuzaki, S. Miyazawa, H. Sugihara, T. Hirose and K. Kasuga, *Chem.-Eur. J.*, 2008, **14**, 11076-11081.

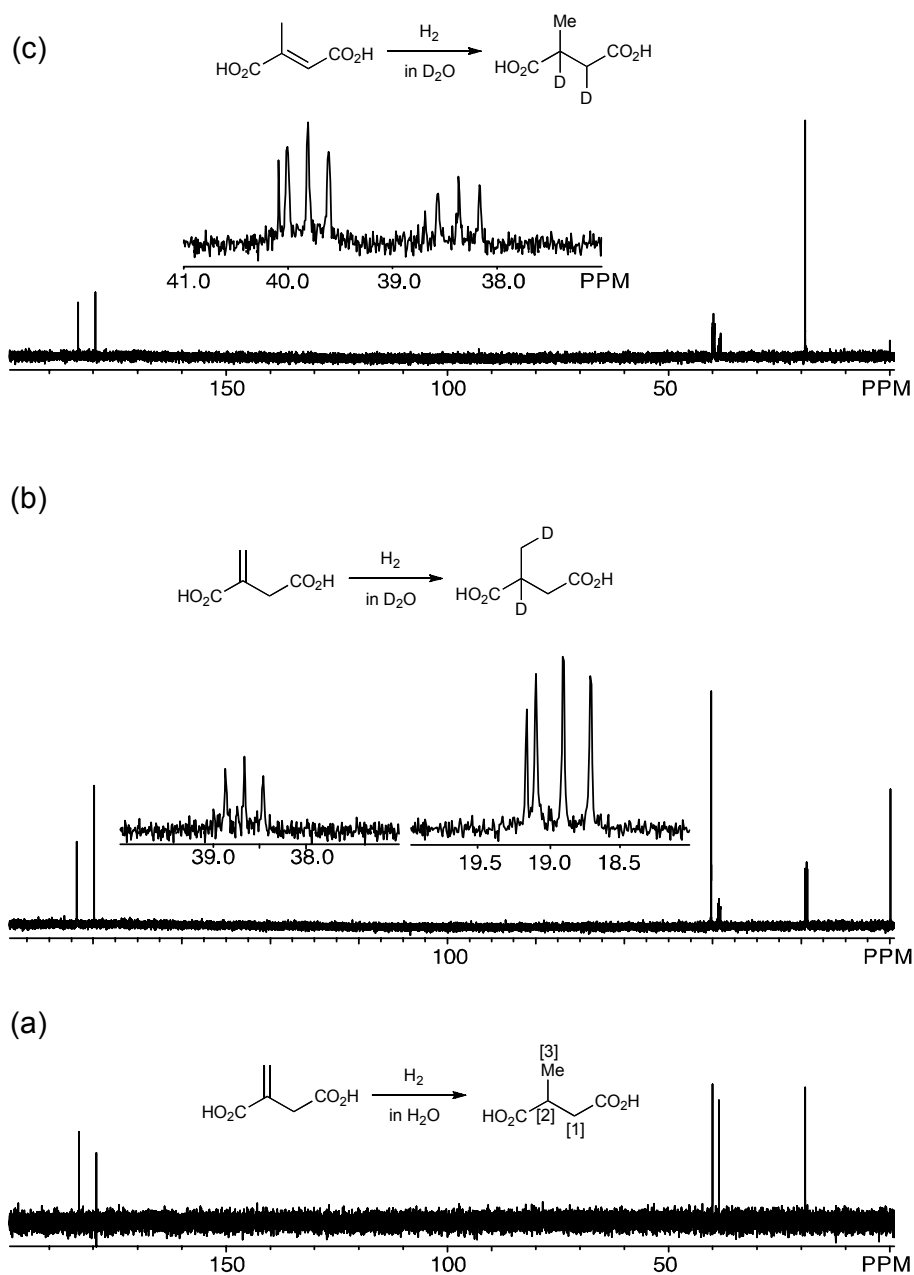

**Figure S1.** Proton decoupled  $^{13}\text{C}$  NMR of methylsuccinic acid from (a) itaconic acid in  $\text{H}_2\text{O}$ , (b) itaconic acid in  $\text{D}_2\text{O}$ , and (c) citraconic acid in  $\text{D}_2\text{O}$  catalyzed by iridium catalyst **1**.

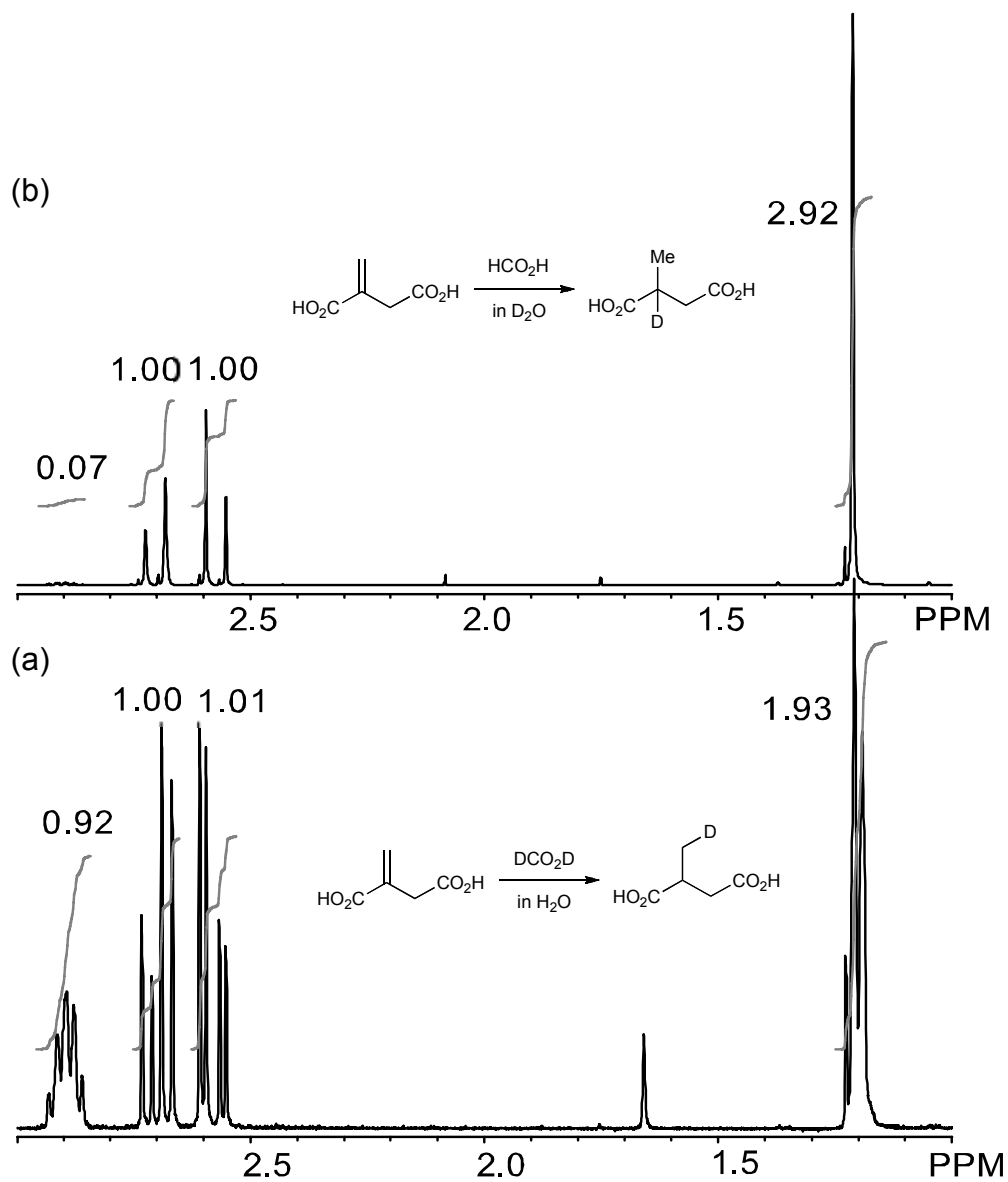

**Figure S2.**  $^1\text{H}$  NMR of methylsuccinic acid from reaction with itaconic acid catalyzed by rhodium catalyst **4** using (a)  $\text{HCO}_2\text{H}$  in  $\text{D}_2\text{O}$ , (b)  $\text{DCO}_2\text{H}$  in  $\text{H}_2\text{O}$ .

$^1\text{H}$  NMR (400 MHz,  $\text{D}_2\text{O}$ )

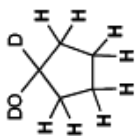

D content was calculated on the basis of the bold protons.

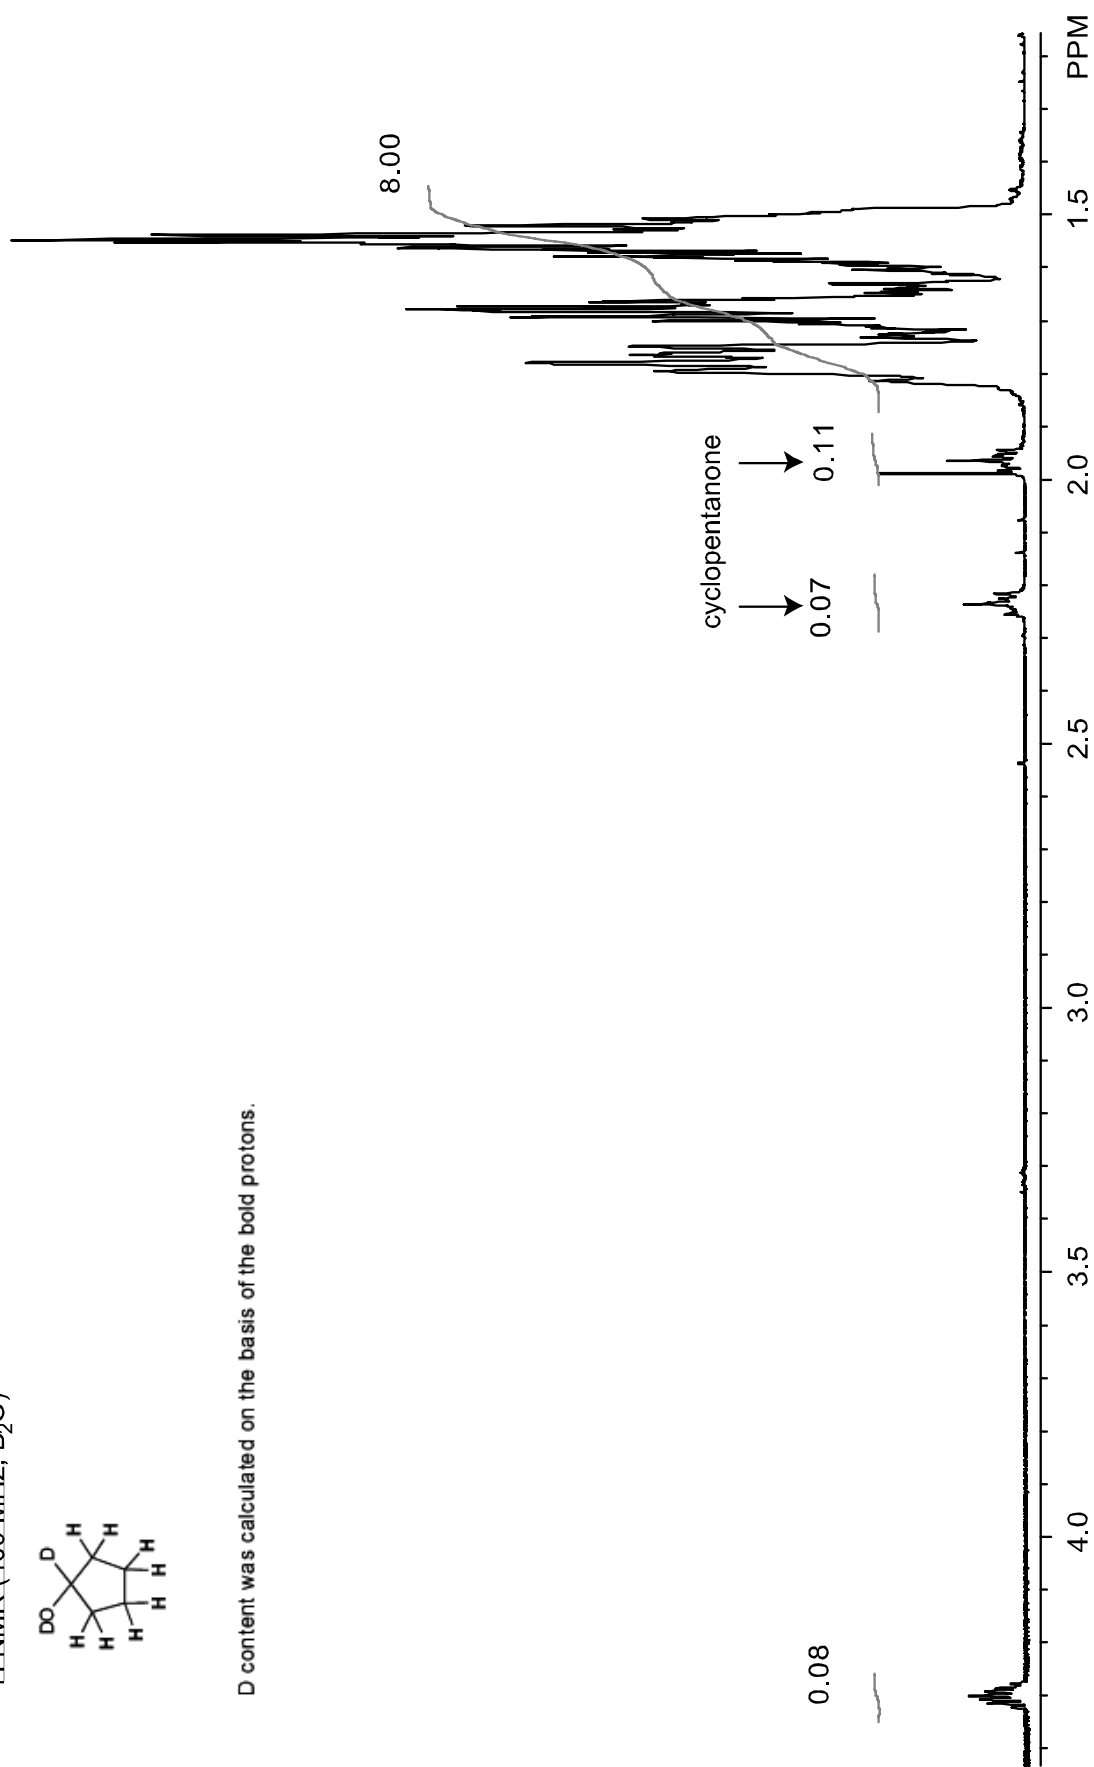

$^{13}\text{C}$  NMR (100 MHz,  $\text{D}_2\text{O}$ )

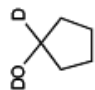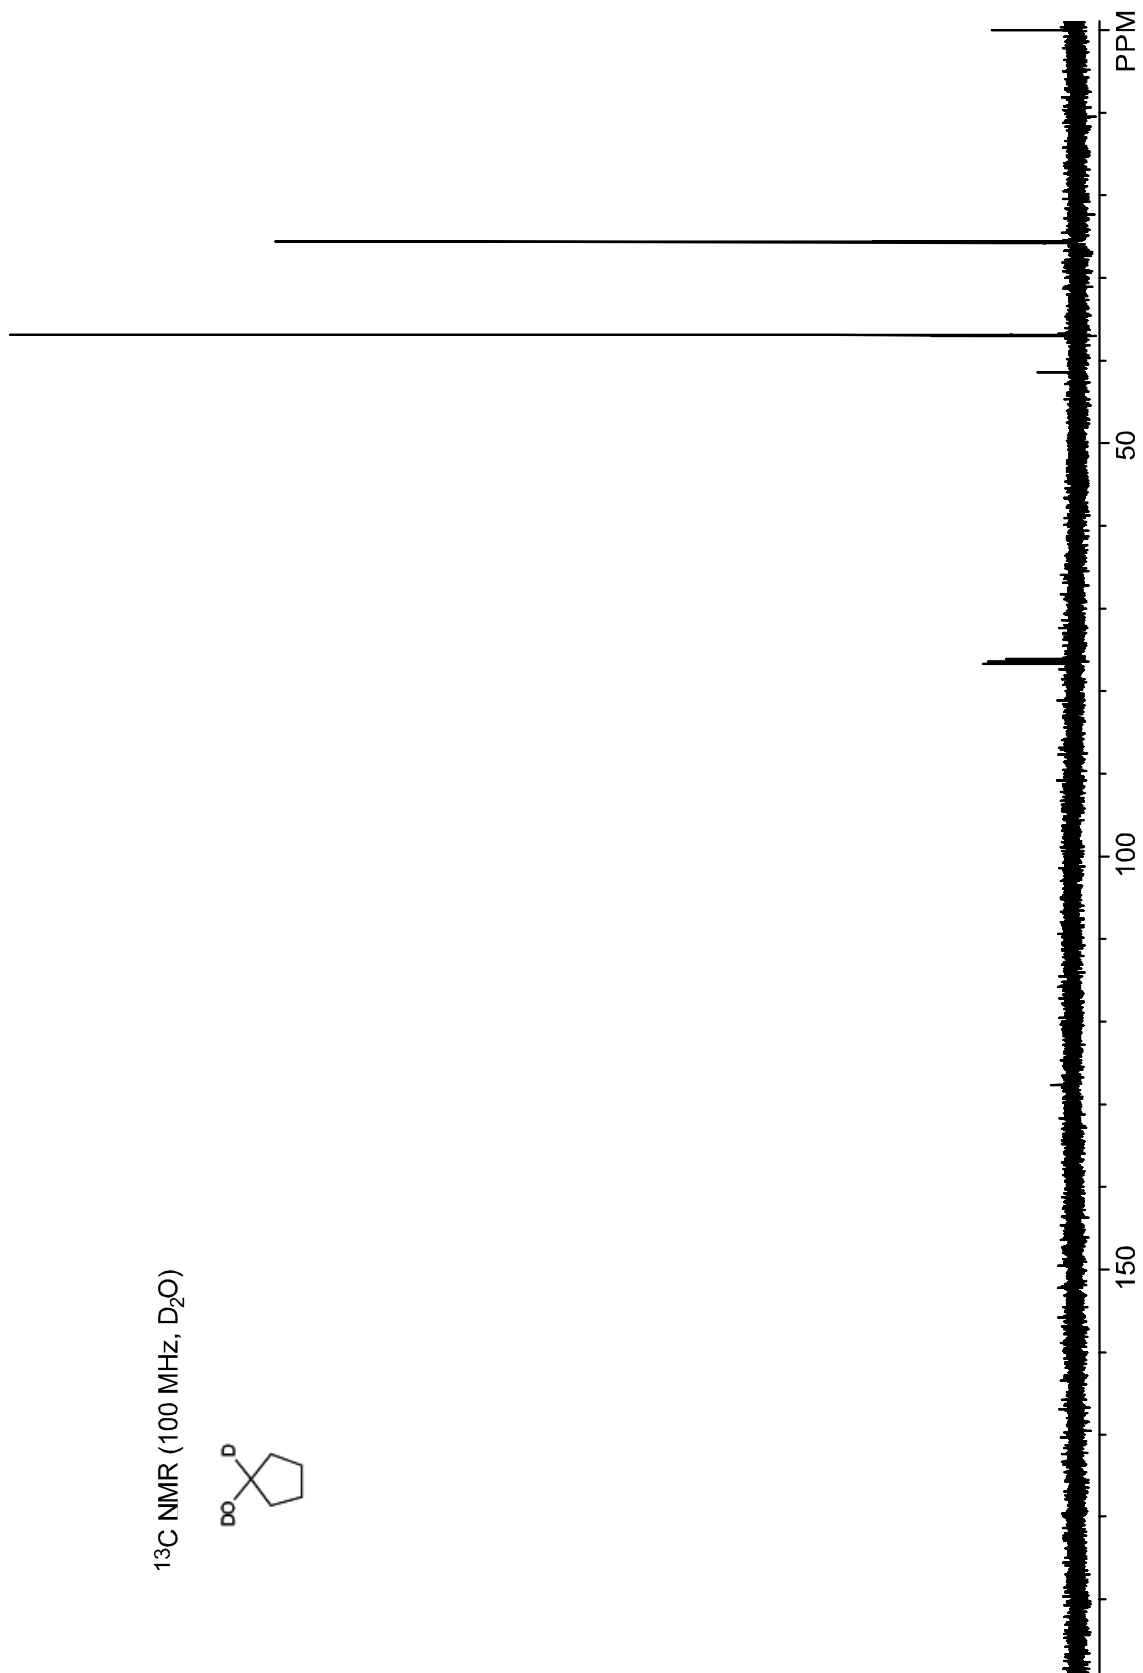



$^1\text{H}$  NMR (400 MHz,  $\text{D}_2\text{O}$ )

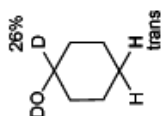

D content was calculated on the basis of the bold proton.

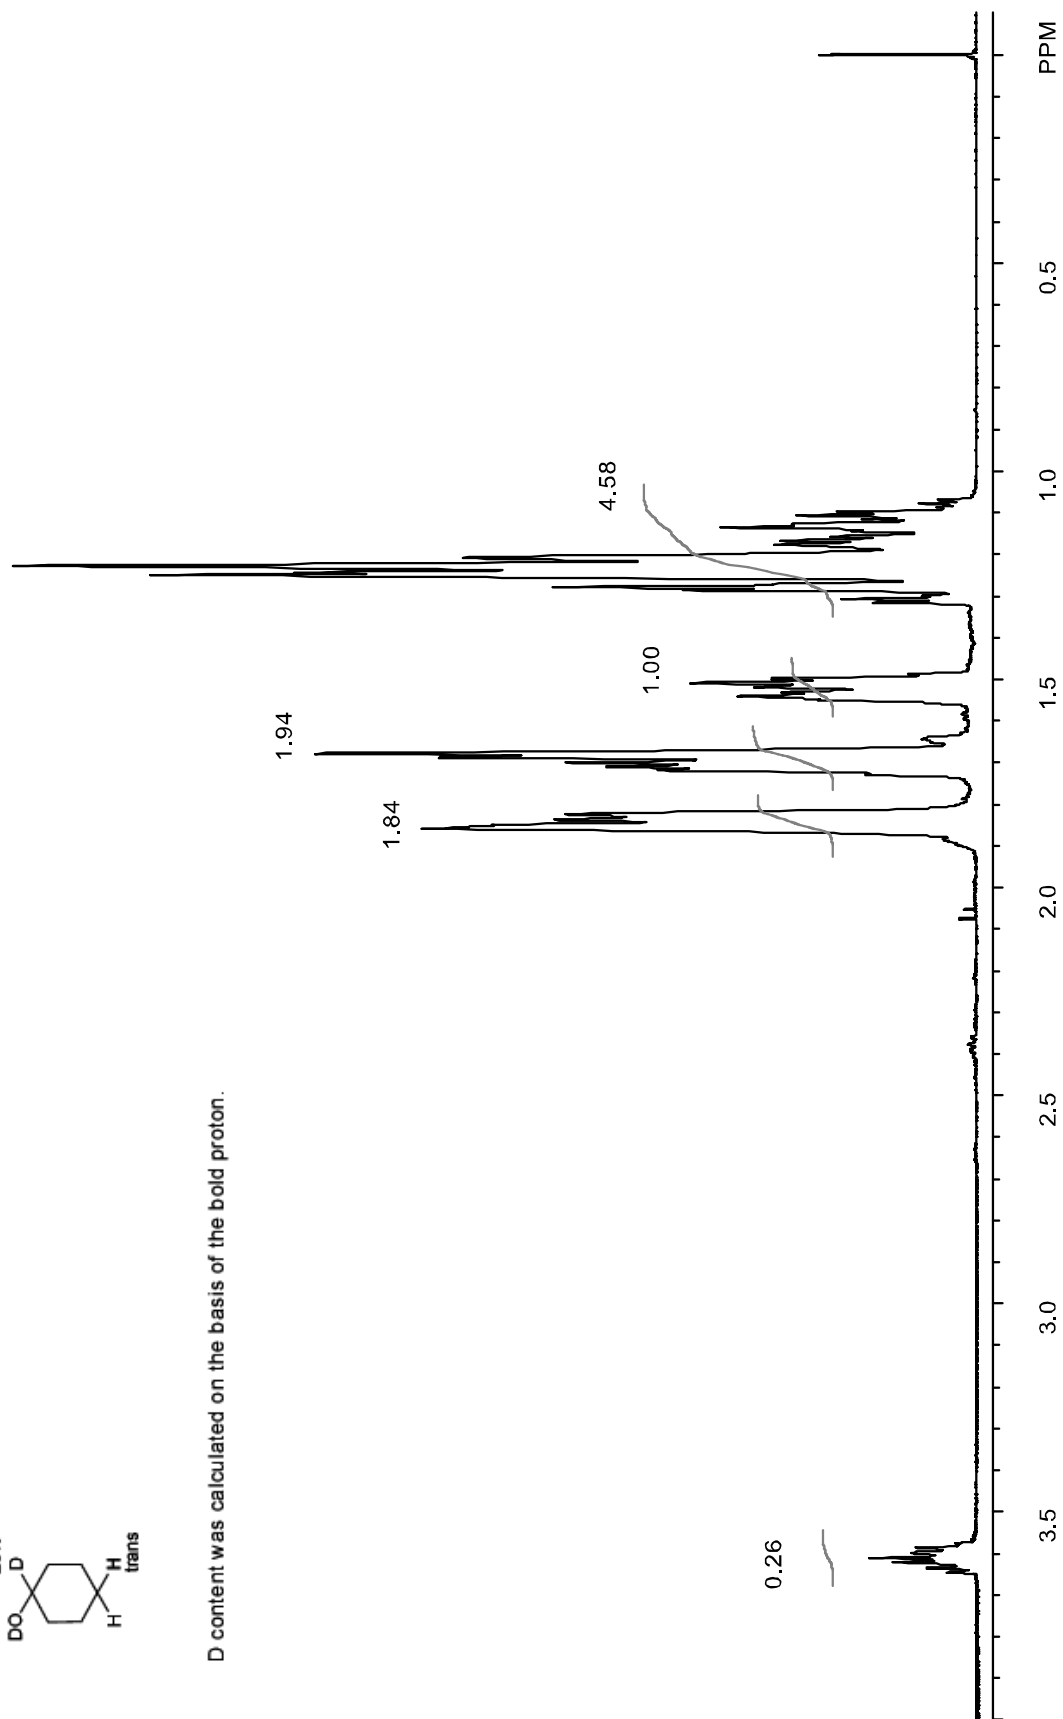

$^{13}\text{C}$  NMR (100 MHz,  $\text{D}_2\text{O}$ )

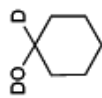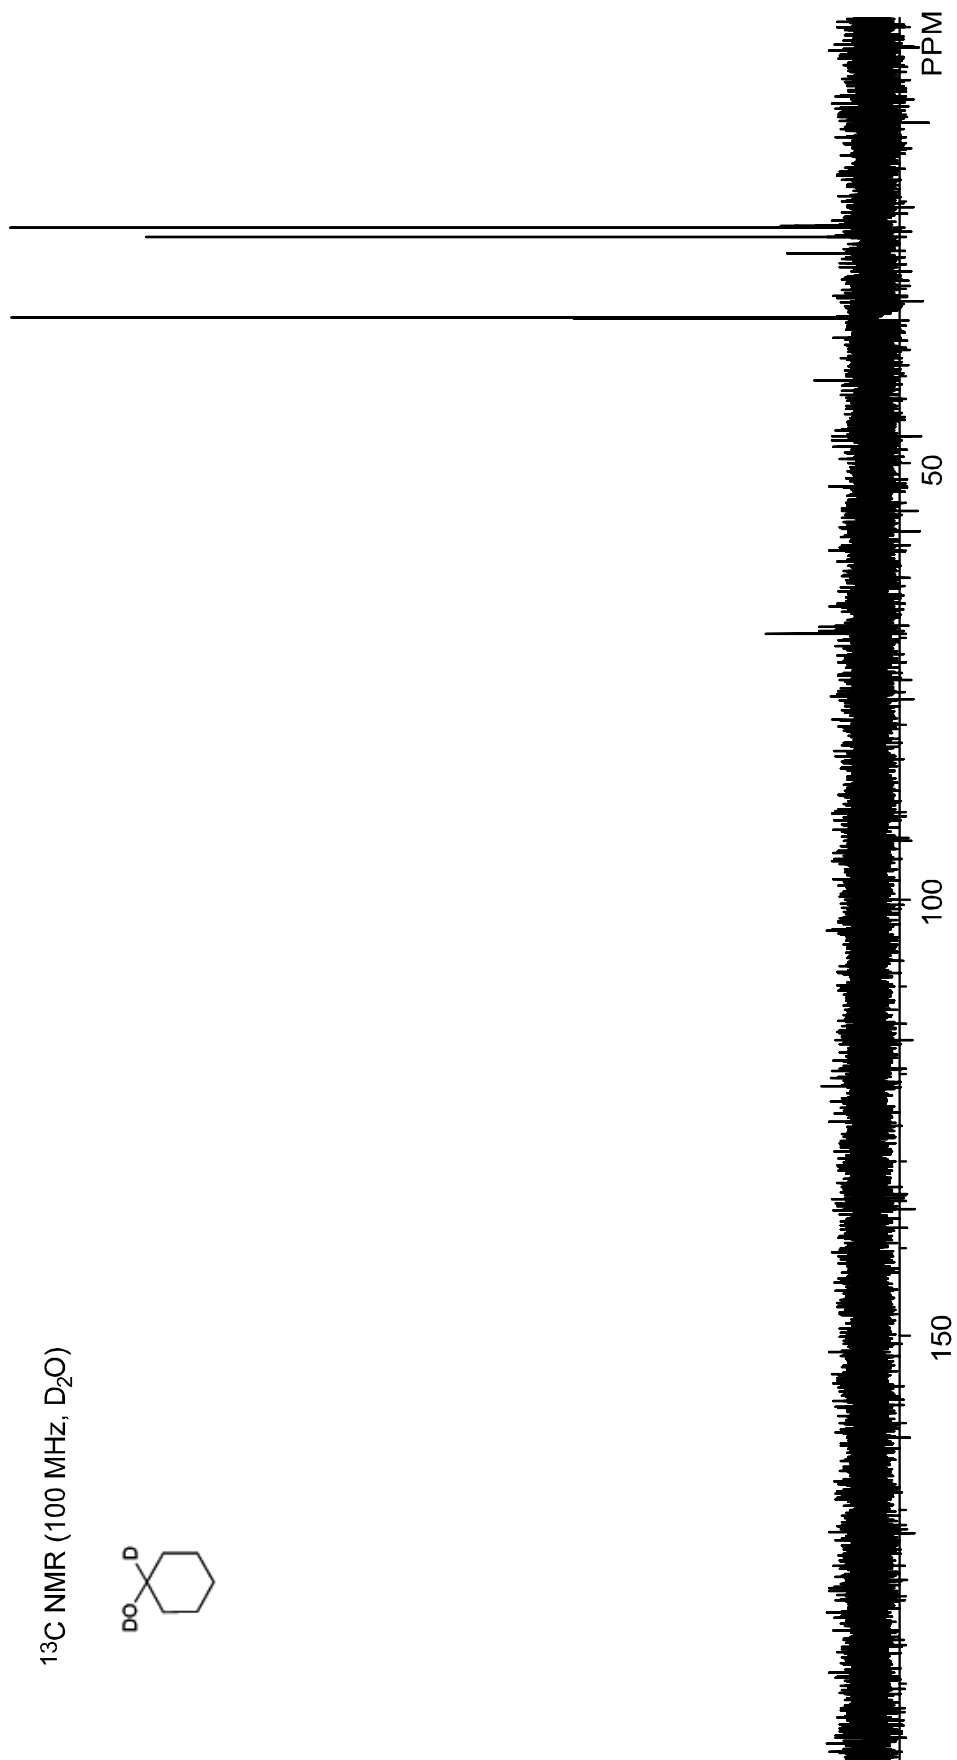

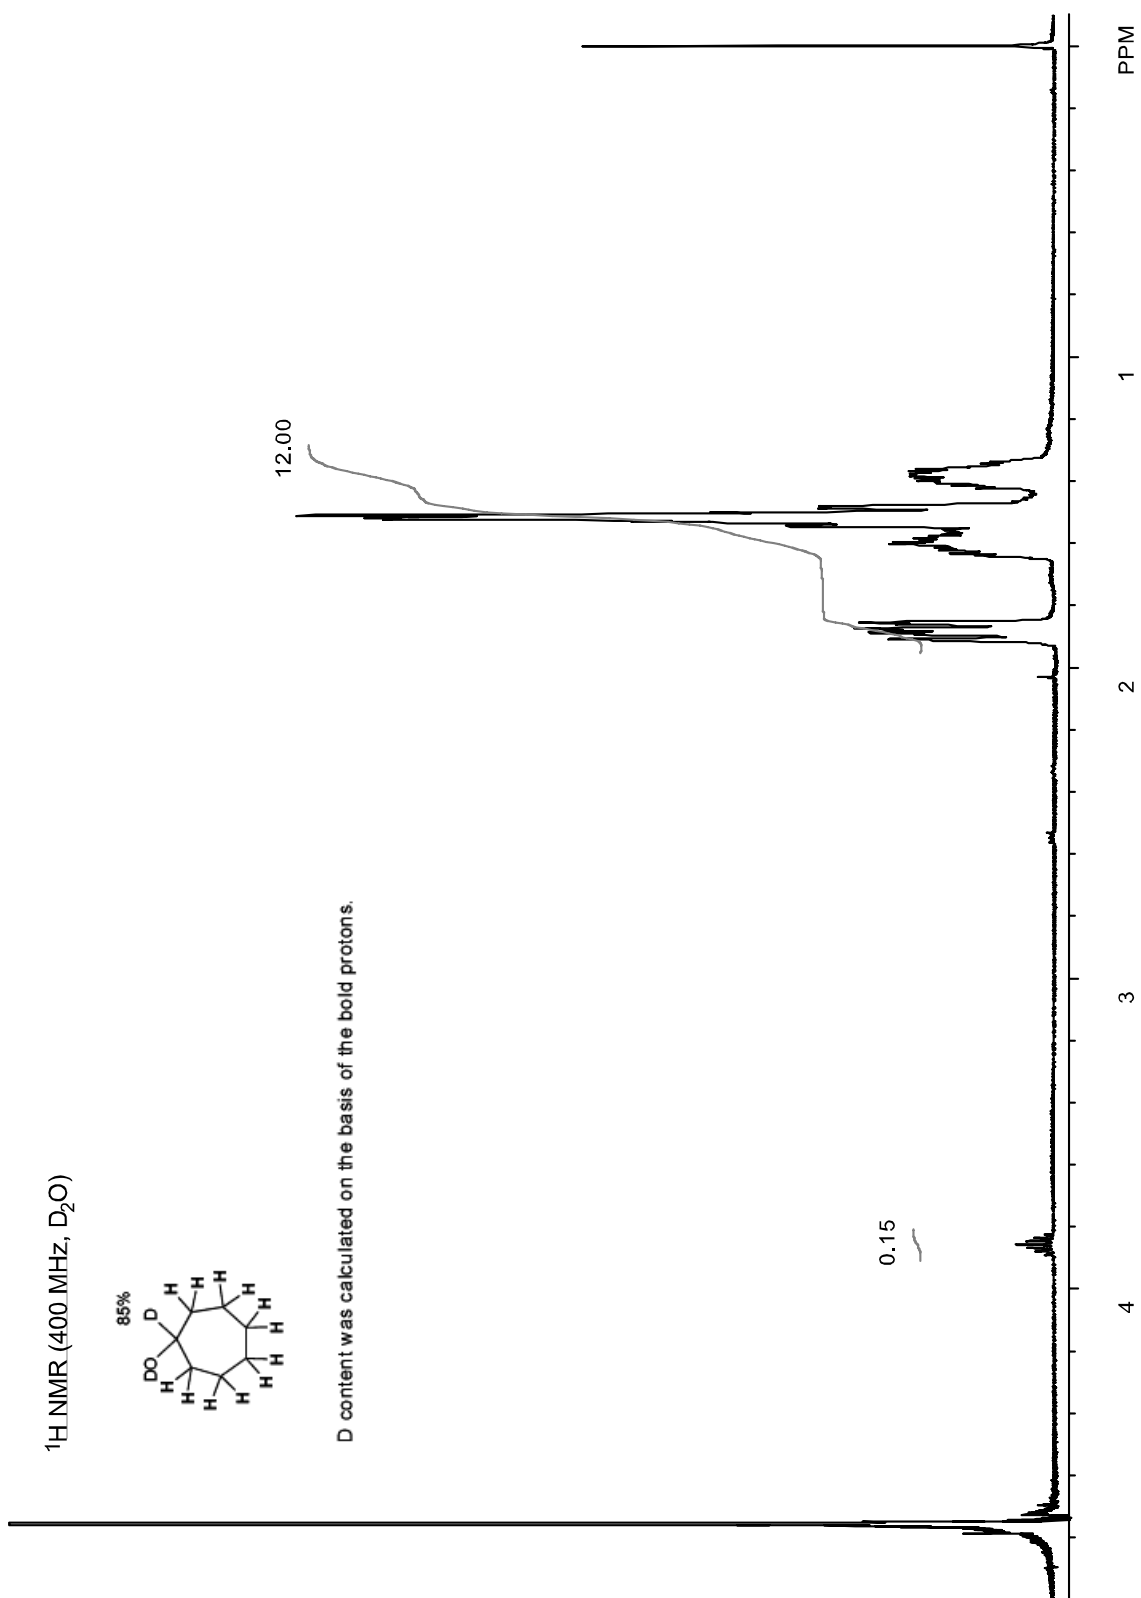

$^{13}\text{C}$  NMR (100 MHz,  $\text{CDCl}_3$ )

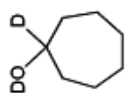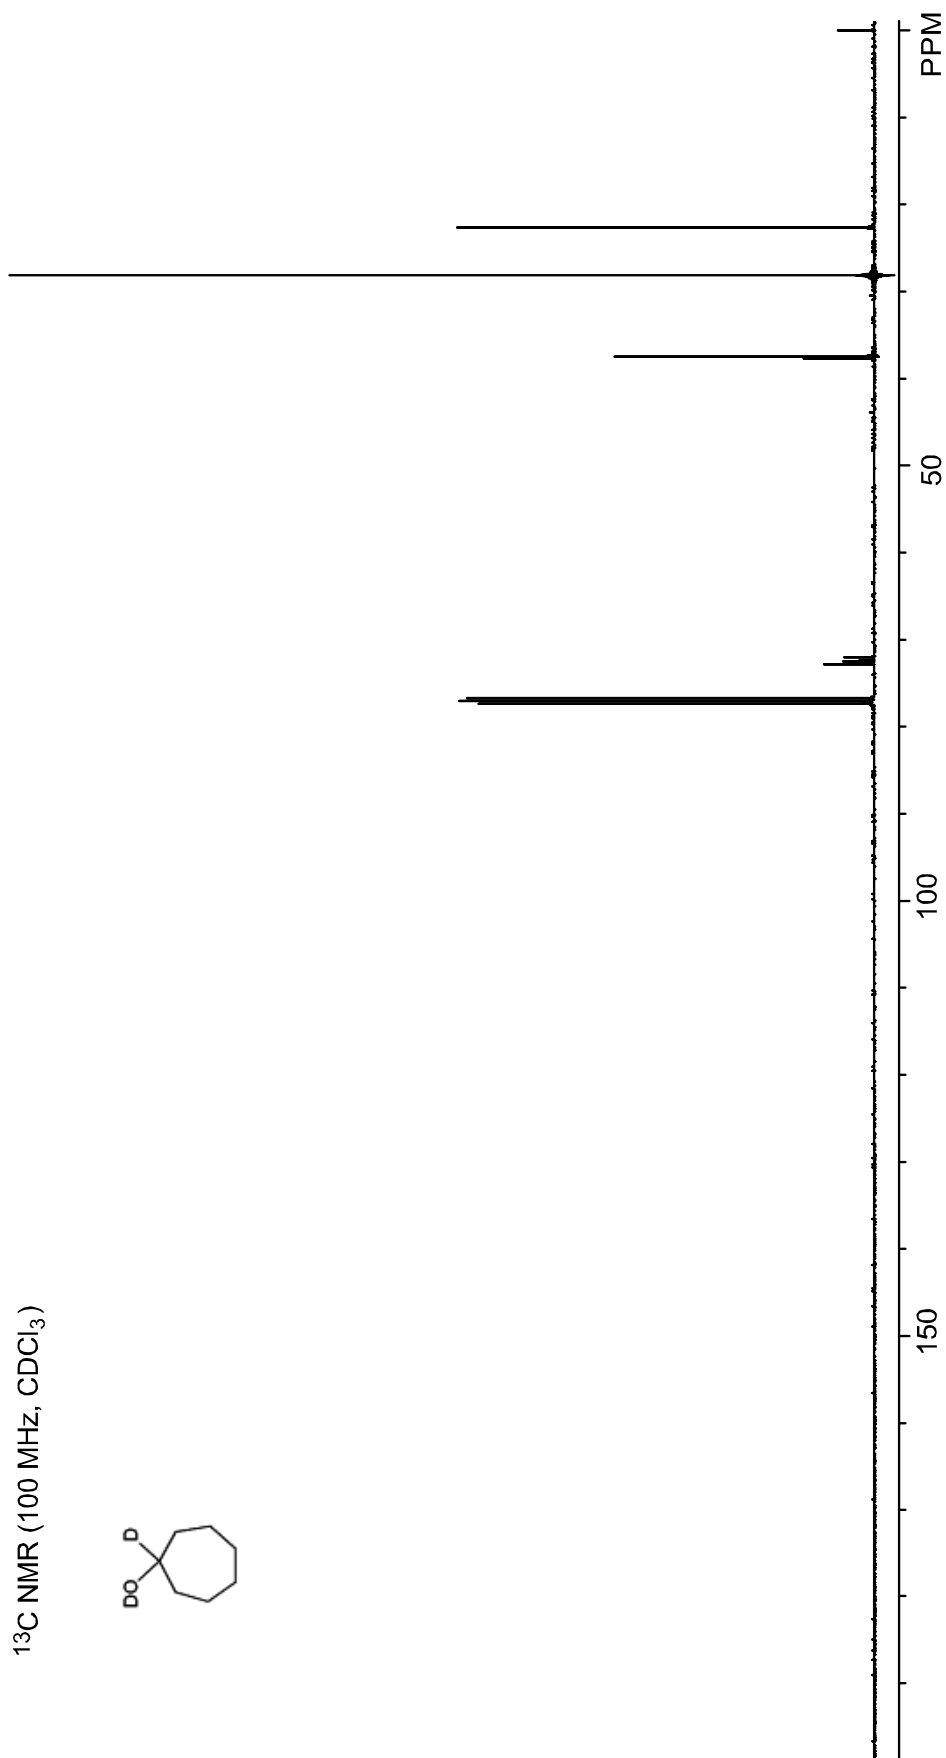

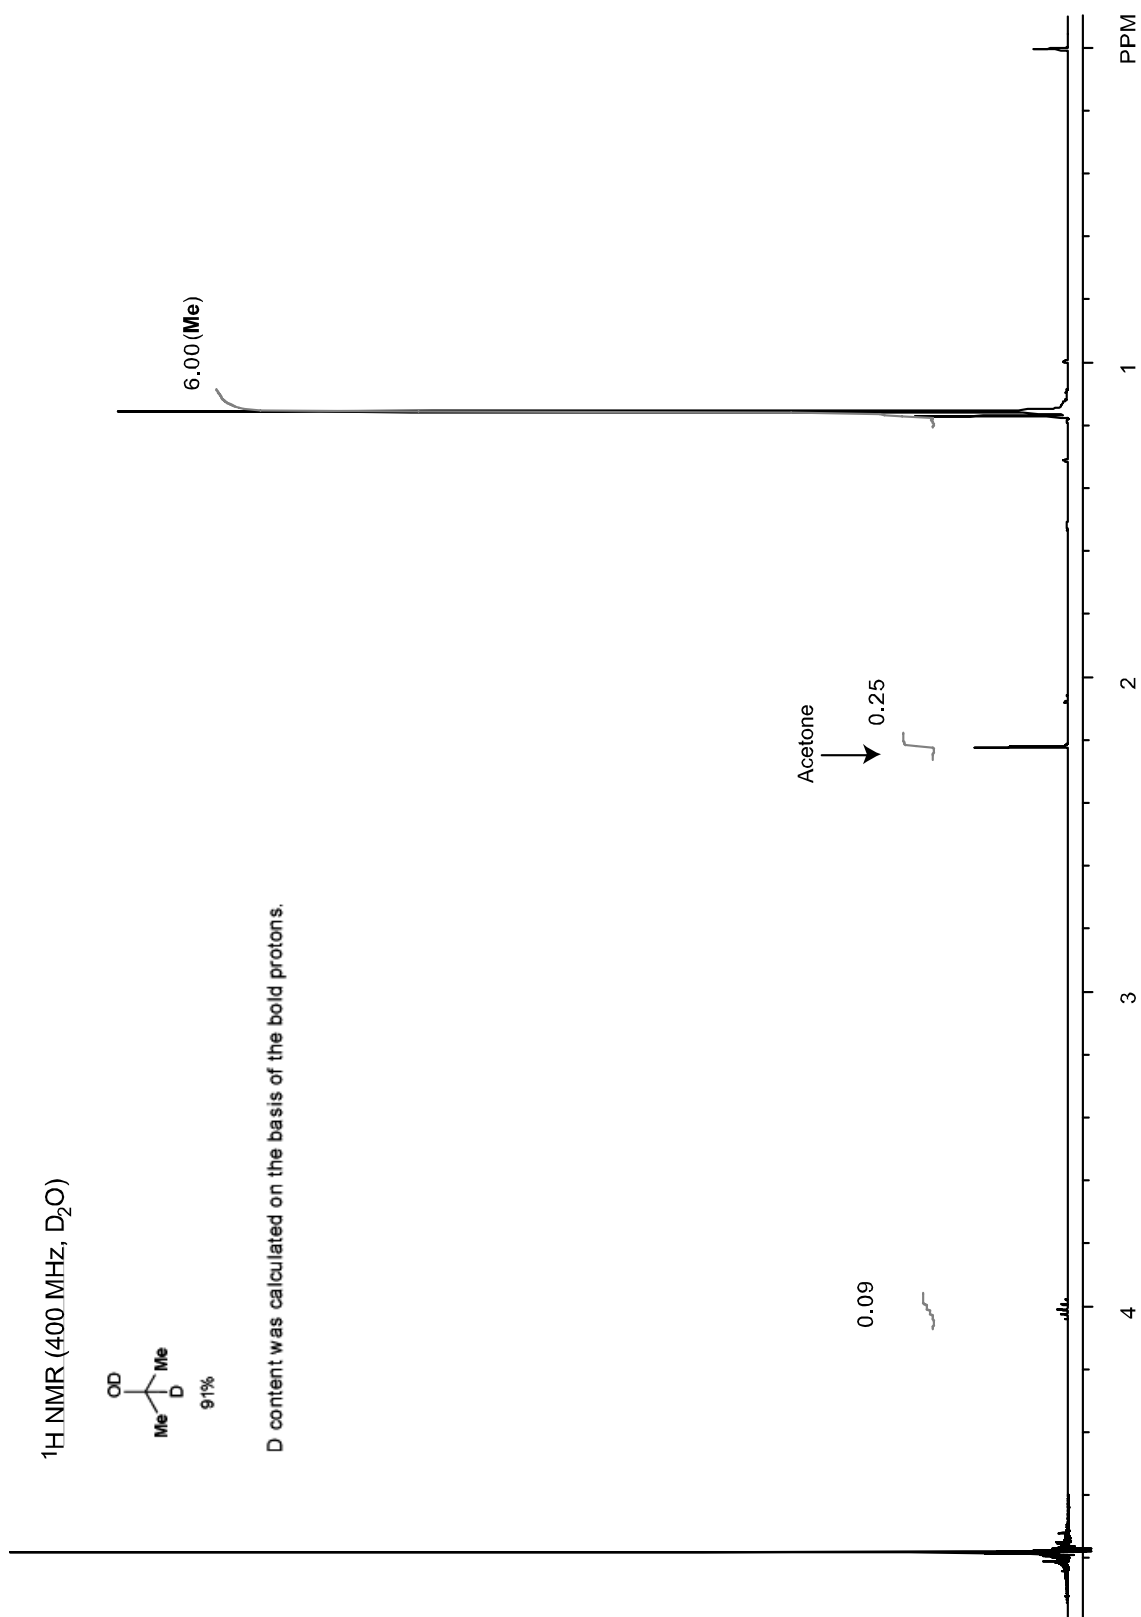

$^{13}\text{C}$  NMR (100 MHz,  $\text{D}_2\text{O}$ )

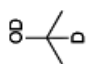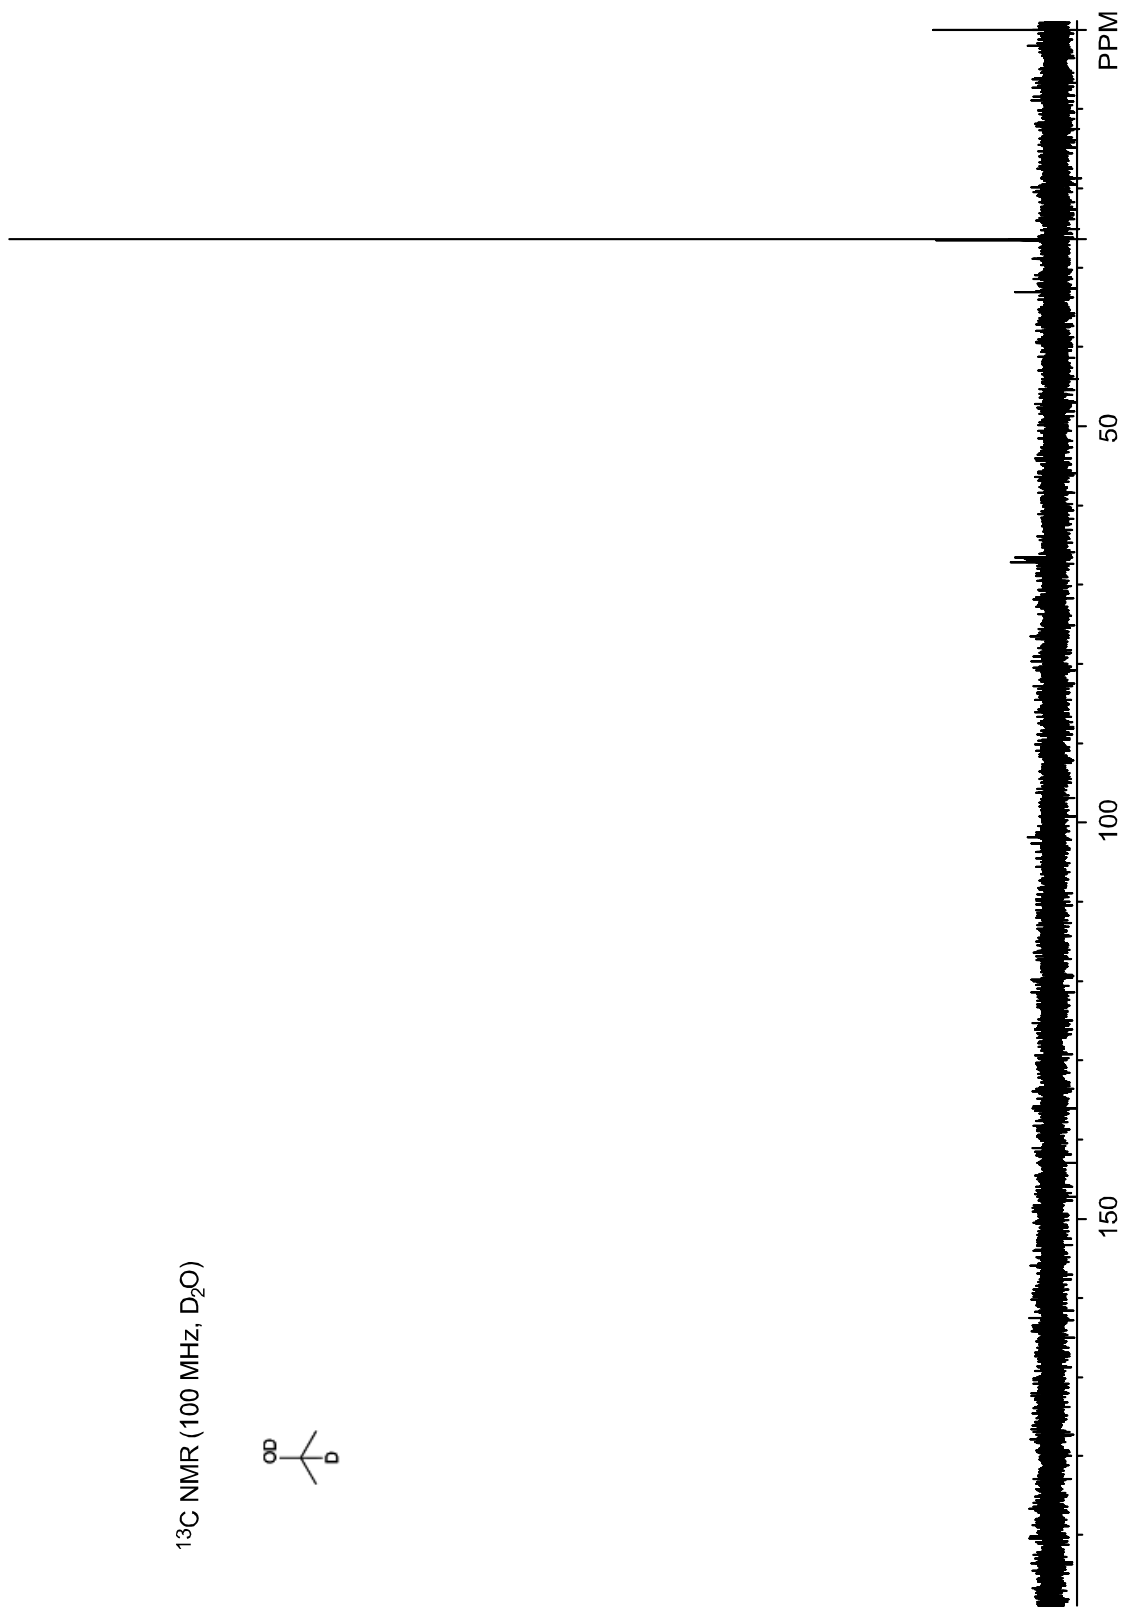

$^1\text{H}$  NMR (400 MHz,  $\text{D}_2\text{O}$ )

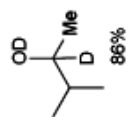

D content was calculated on the basis of the bold protons.

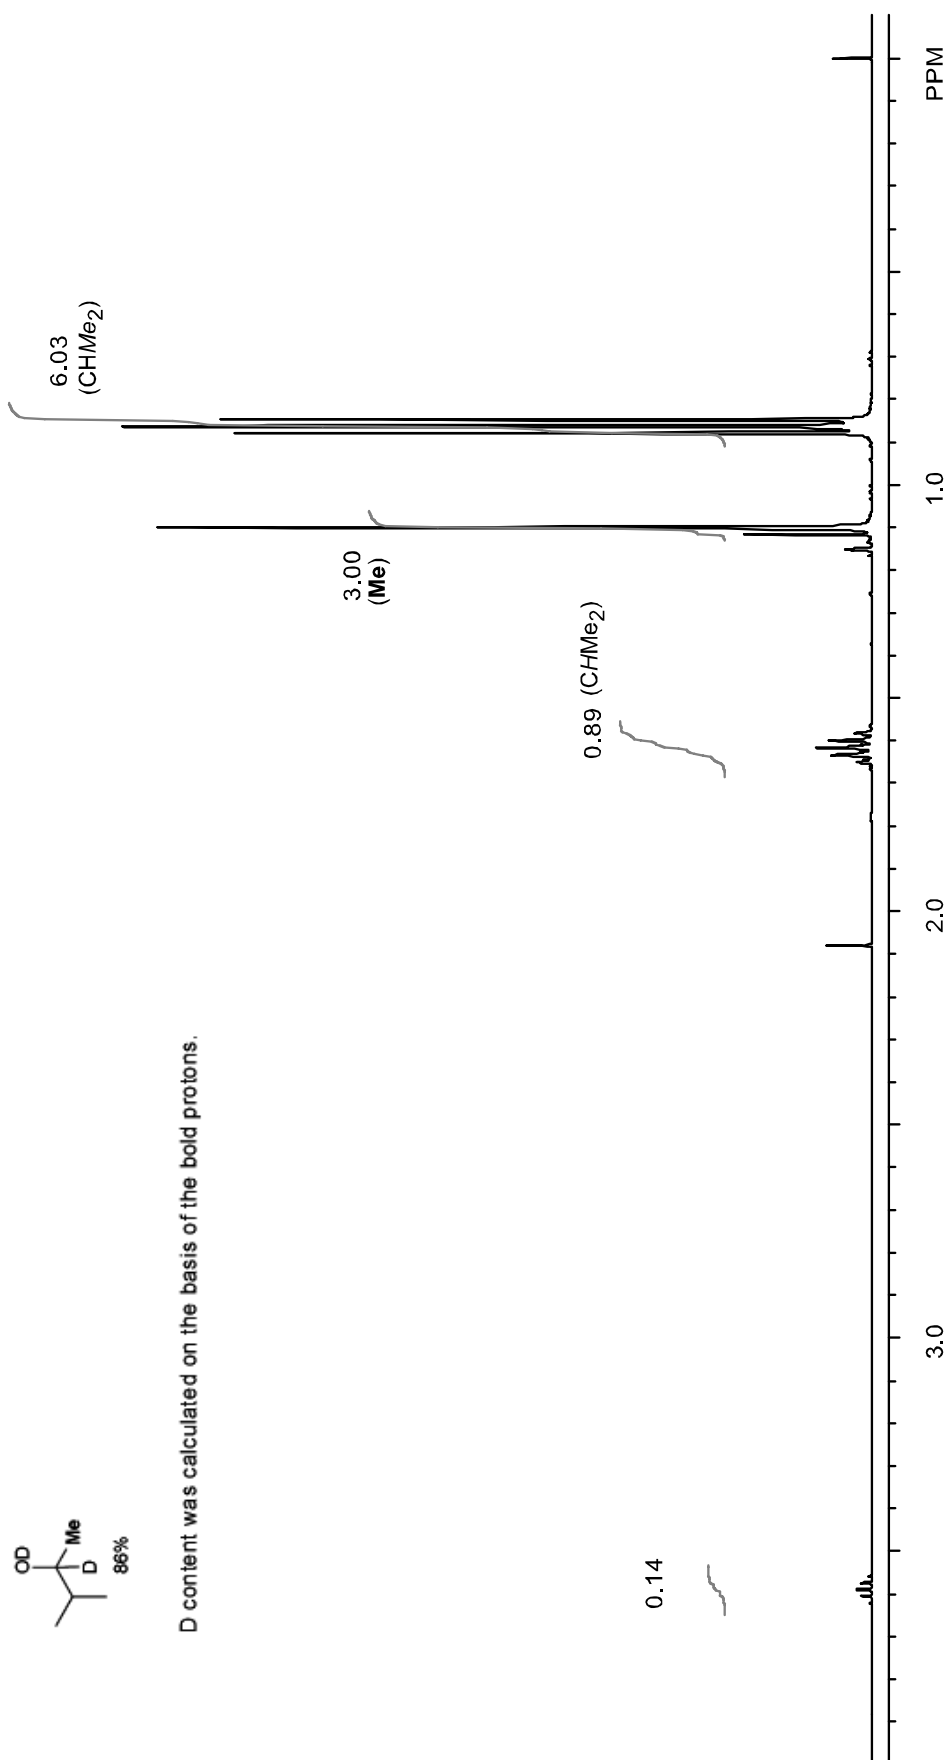

$^{13}\text{C}$  NMR (100 MHz,  $\text{D}_2\text{O}$ )

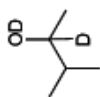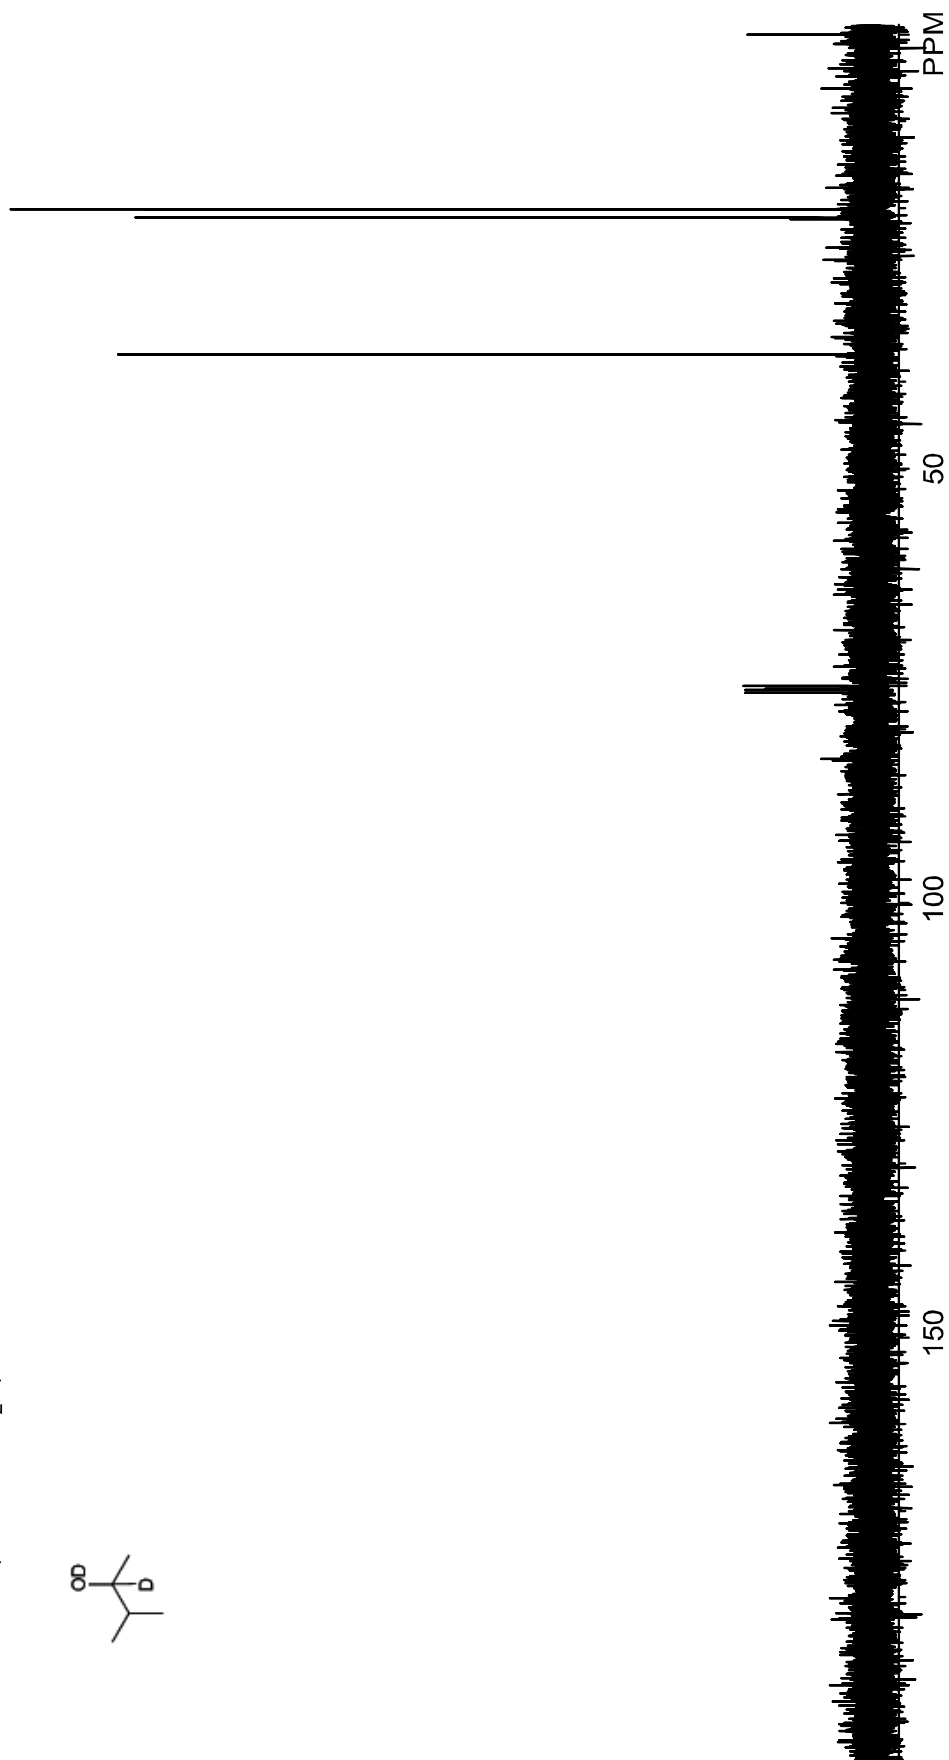



$^1\text{H}$  NMR (400 MHz,  $\text{CDCl}_3$ )

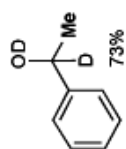

D content was calculated on the basis of the bold protons.

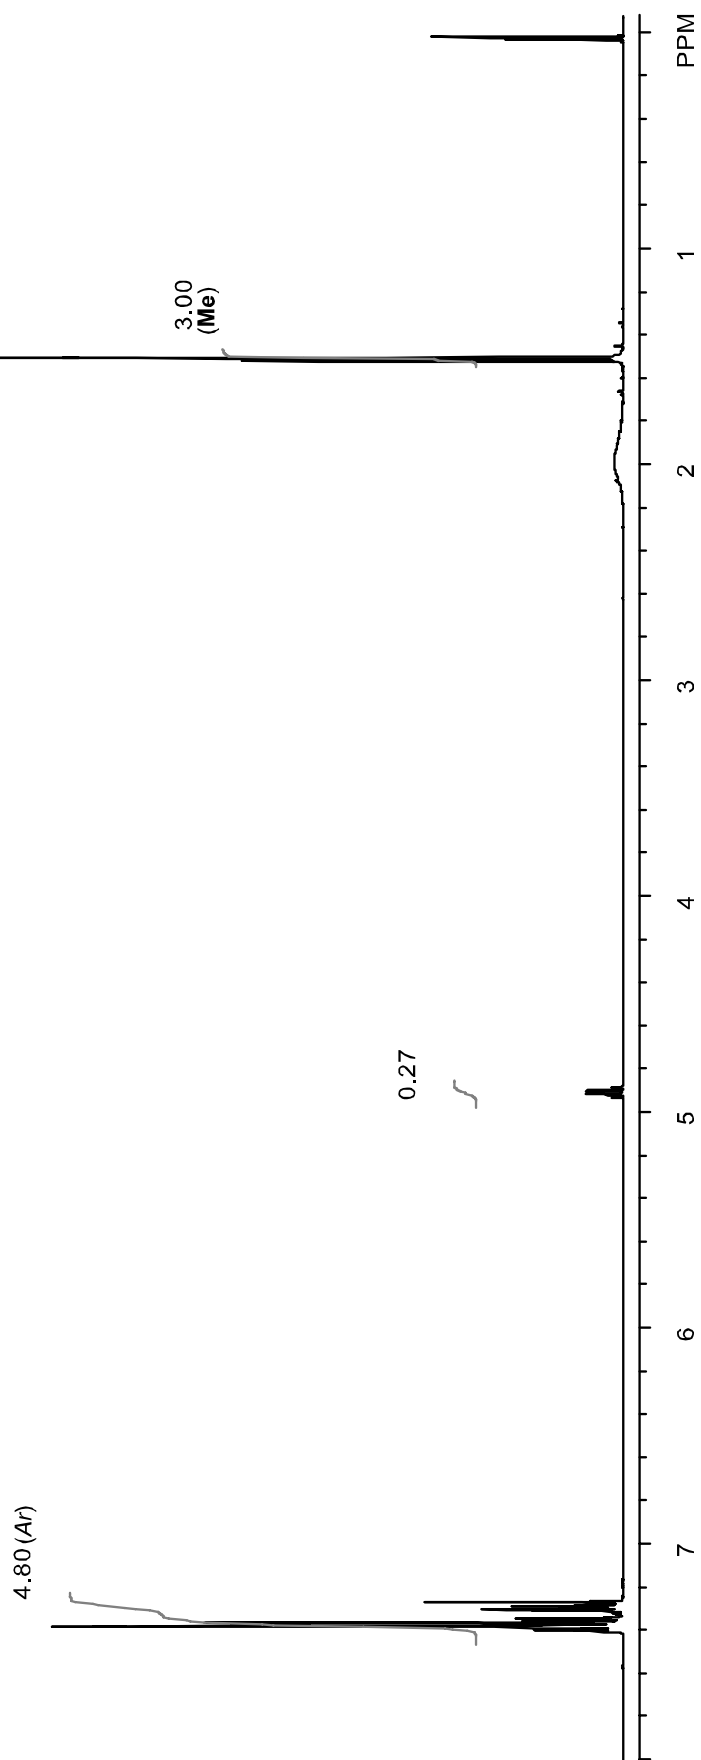

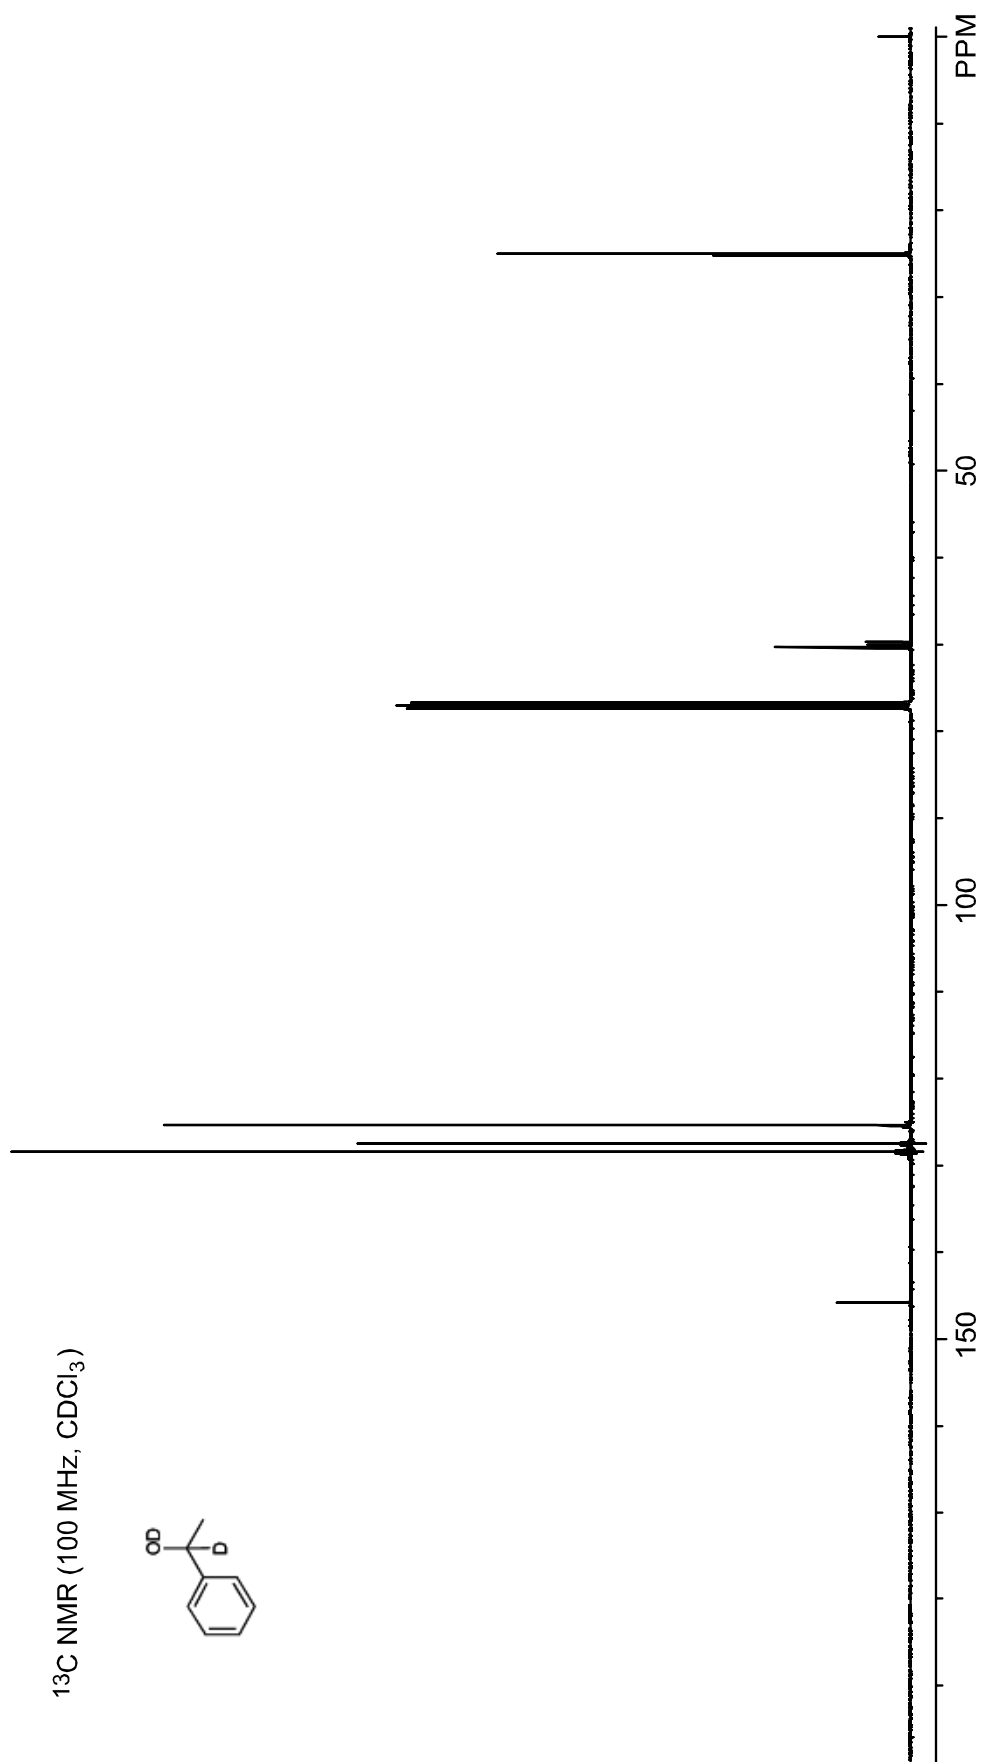

$^1\text{H NMR}$  (400 MHz,  $\text{CDCl}_3$ )

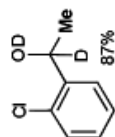

D content was calculated on the basis of the bold protons.

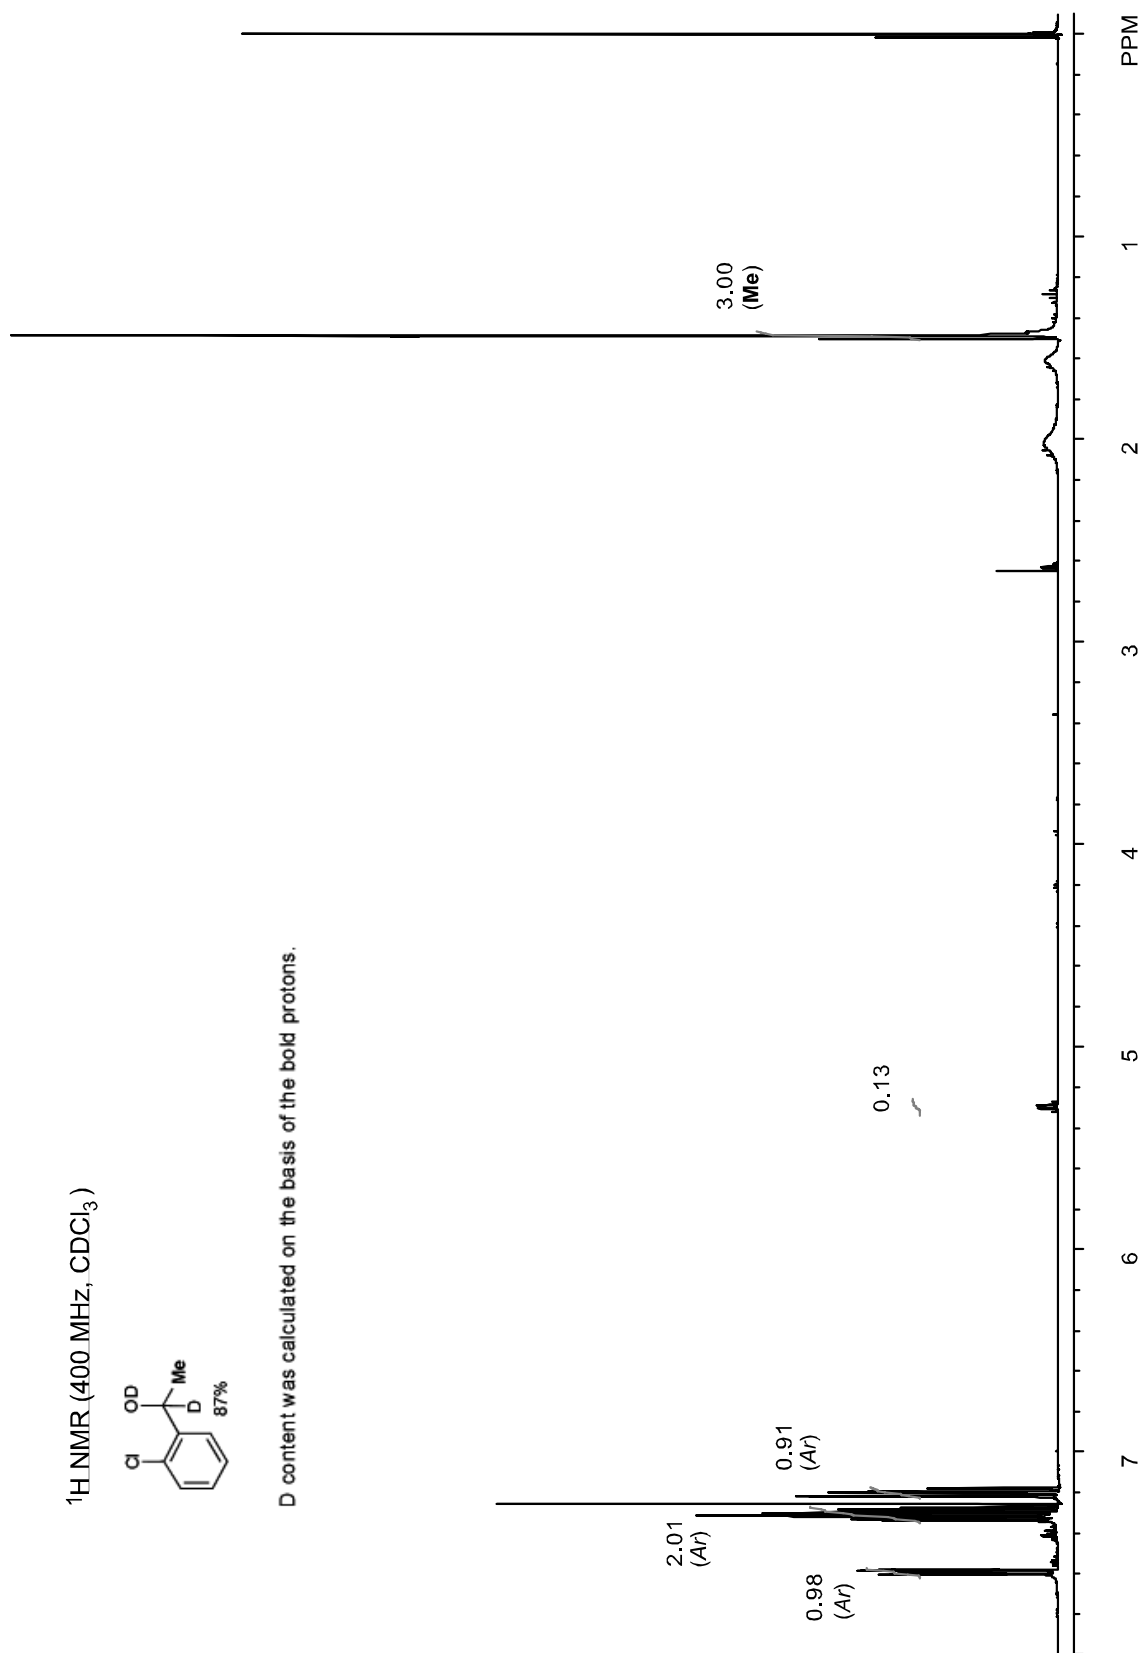

$^{13}\text{C}$  NMR (100 MHz,  $\text{CDCl}_3$ )

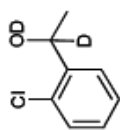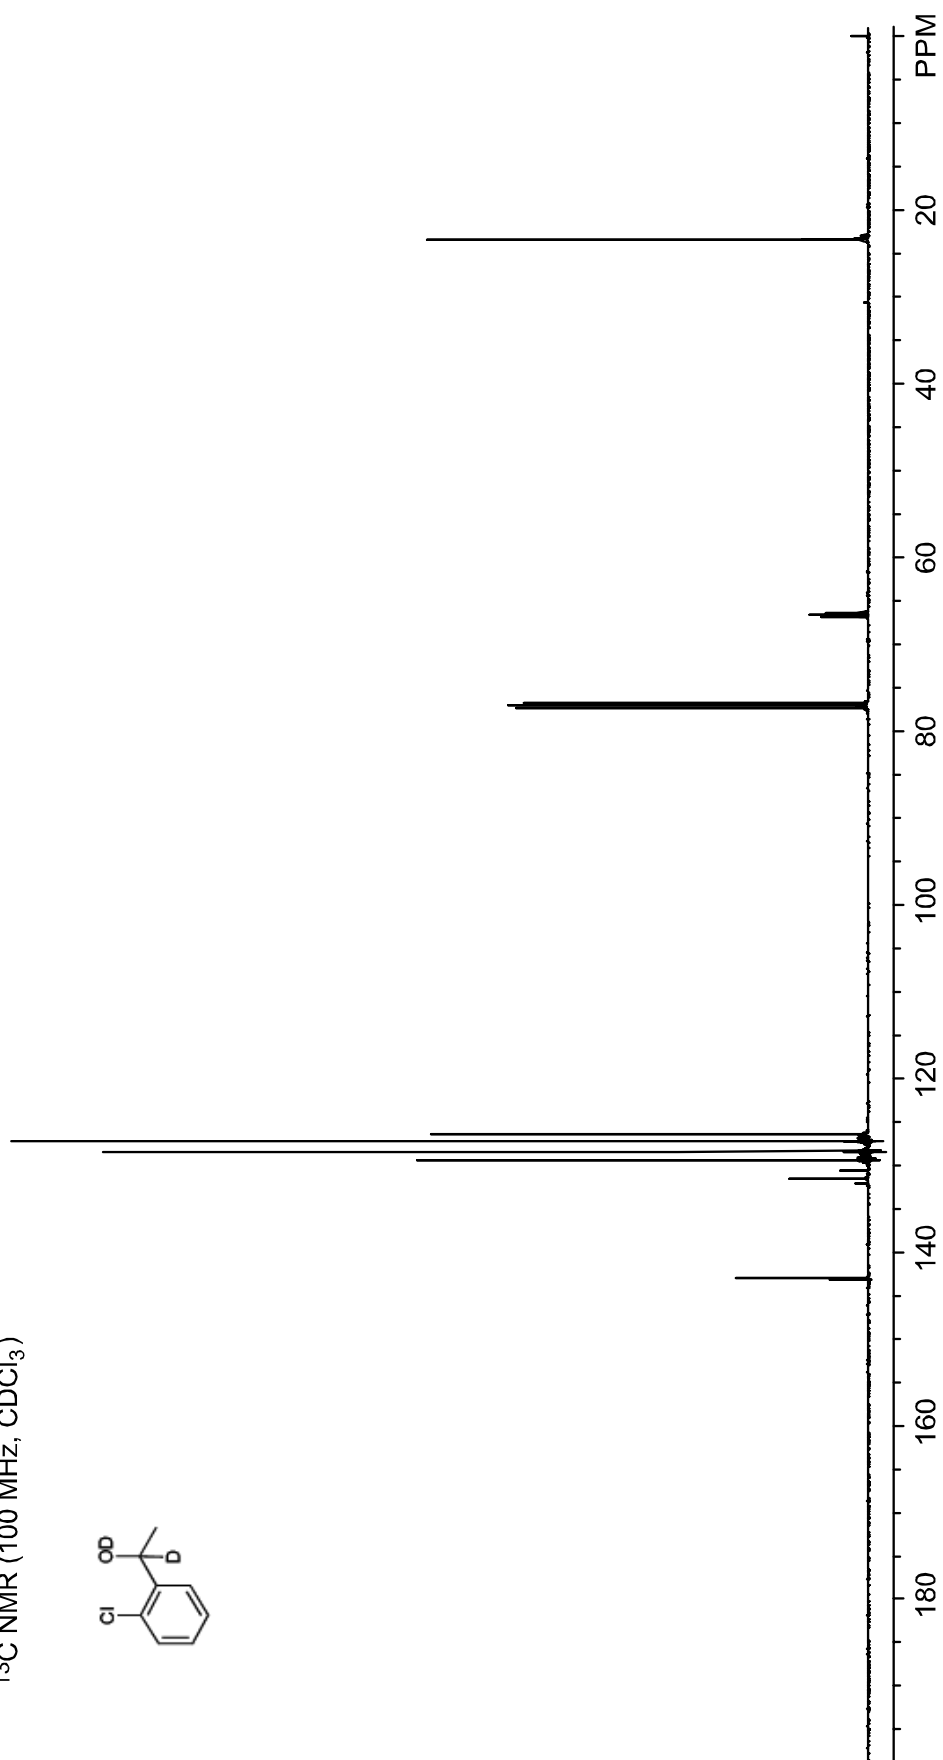

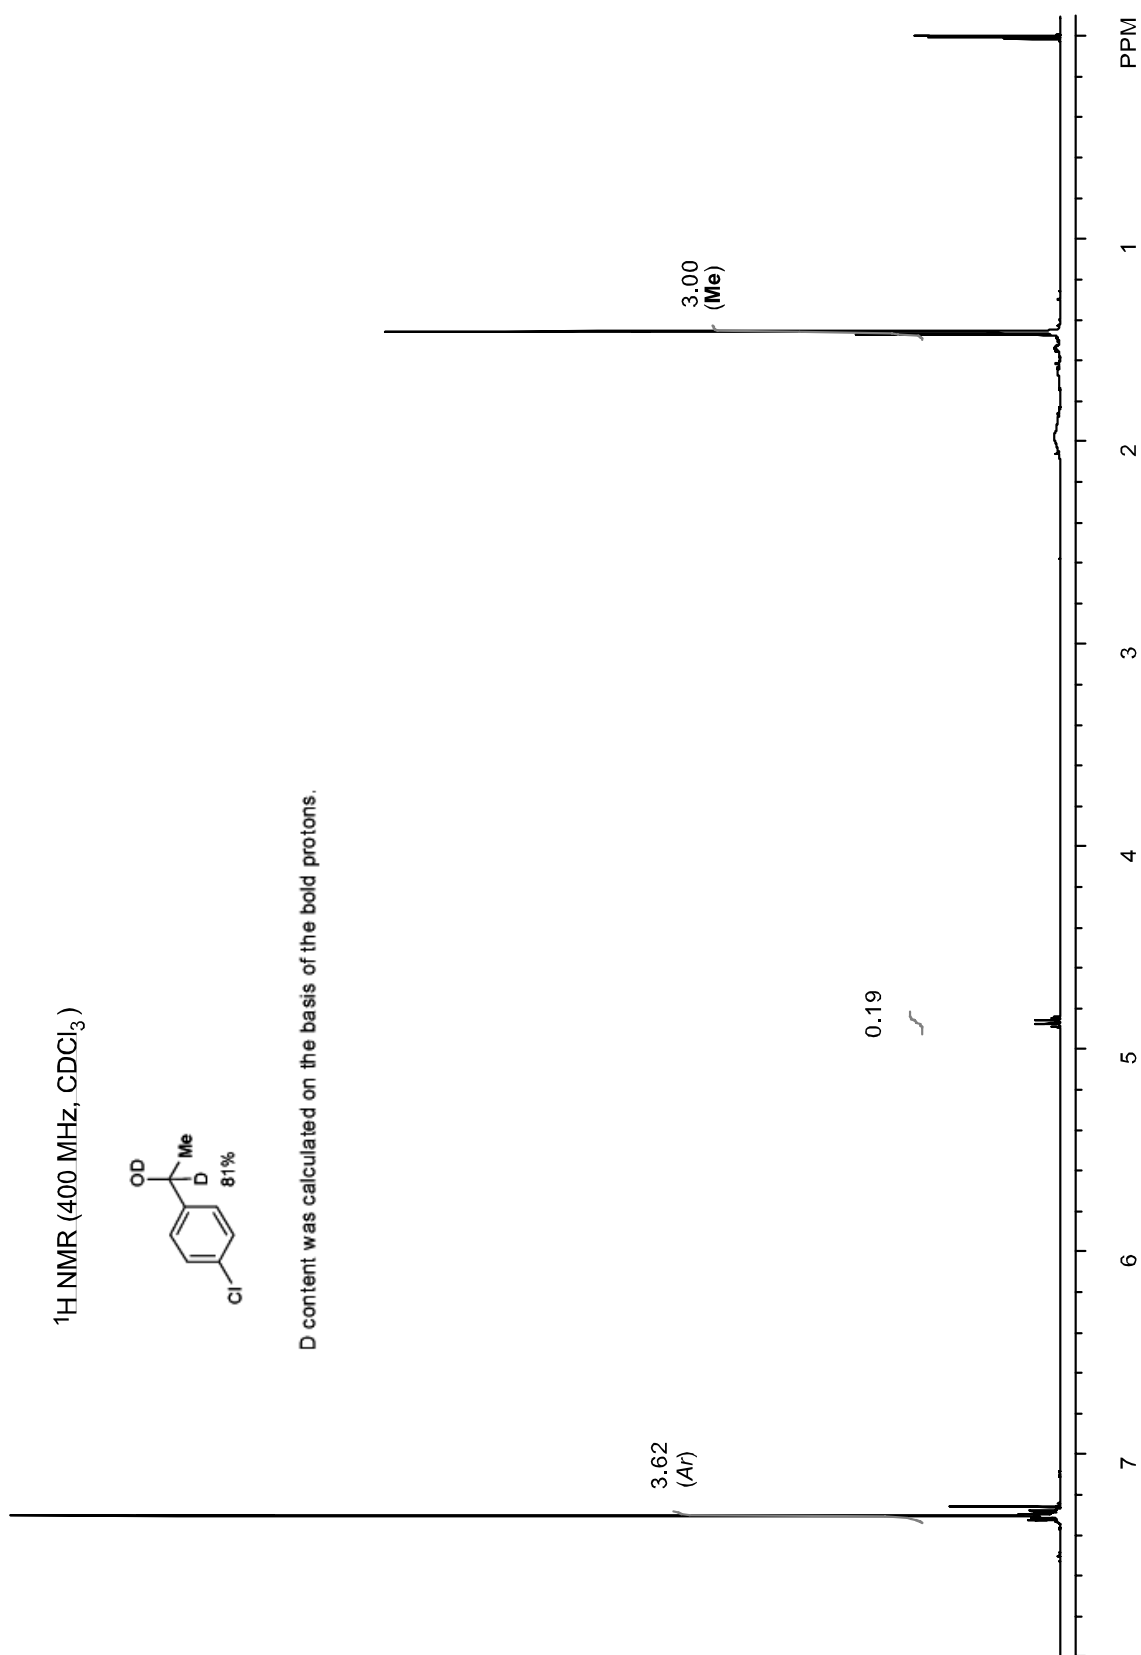

Supplement: b908764h.pdf [file b908764h.pdf]
